# Supplementary material for: Quantifying and Modeling Birth Order Effects in Autism
Source: PLoS One. 2011 Oct 19;6(10):e26418. doi: 10.1371/journal.pone.0026418 (PMC3198479; doi:10.1371/journal.pone.0026418)
Supplement: Table S2 — Observed number of affected individuals for each sibship size and birth rank. (DOC) [file pone.0026418.s005.doc]

*Table S2: Observed number of affected individuals for each sibship size and birth rank.*

| Sibship size (*Nj*) | Birth Rank | | | | | Total |
| --- | --- | --- | --- | --- | --- | --- |
| 1 | 2 | 3 | 4 | 5 |
| 2 | *n21* | *n22* | 0 | 0 | 0 | *n2.* |
| 3 | *n31* | *n32* | *n33* | 0 | 0 | *n3.* |
| 4 | *n41* | *n42* | *n43* | *n44* | 0 | *n4.* |
| 5 | *n51* | *n52* | *n53* | *n54* | *n55* | *n5,* |
| Observed | *O1* | *O2* | *O3* | *O4* | *O5* | *n* |
